# Supplementary material for: A universal bioluminescence resonance energy transfer sensor design enables high-sensitivity screening of GPCR activation dynamics
Source: PubMed Central journal article supplement (PMC6123785; doi:10.1038/s42003-018-0072-0), 2018-08-07
Supplement: 42003_2018_72_MOESM1_ESM.pdf [file 42003_2018_72_MOESM1_ESM.pdf]

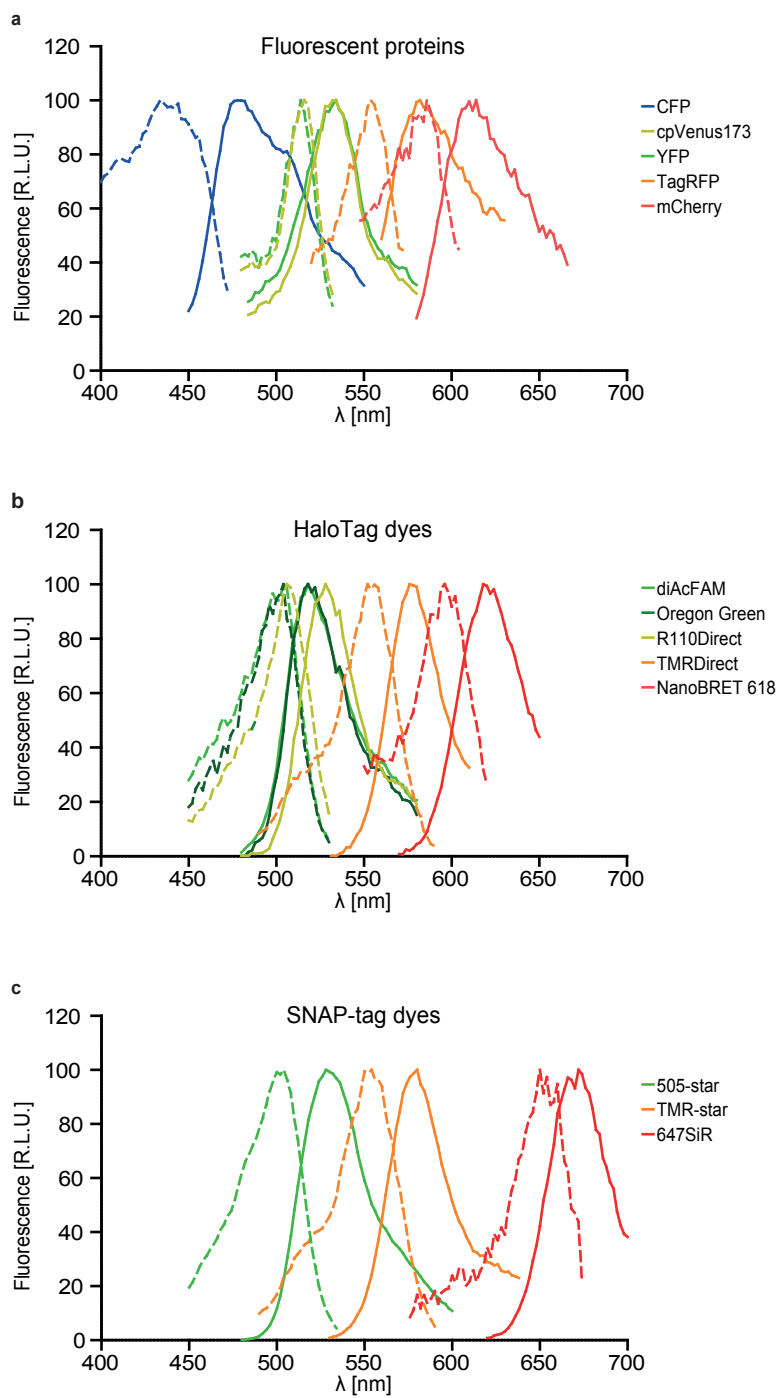

**Supplementary Figure 1.** Excitation and emission spectra of fluorescent proteins and dyes employed in the study. HEK-TSA cells were transiently transfected with  $\alpha_{2A}$ AR fused to different tags. The excitation (dotted line) and emission (filled line) spectra were recorded of (a) fluorescent proteins and the self-labeling protein tags (b) SNAP and (c) Halo-tag after labeling (each N=1).

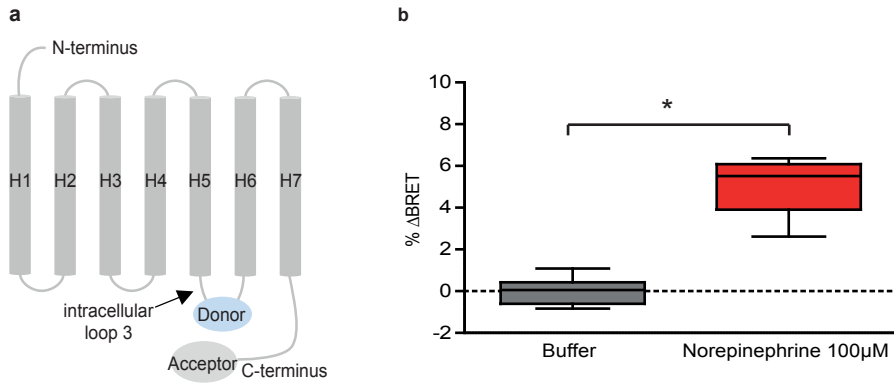

**Supplementary Figure 2.** Effect on BRET amplitude caused by the inversion of the positions of donor and acceptor in the  $\alpha_{2A}$ AR-biosensor. Cells were transiently transfected with the inverted  $\alpha_{2A}$ AR BRET sensor version (**a**) Schematic of the biosensor (**b**) Amplitude of norepinephrine-induced change in BRET normalized for buffer. Data show box and whisker plots of 4 independent experiments. Difference was analyzed by Student's t-test. \* $p \leq 0,05$  versus buffer.

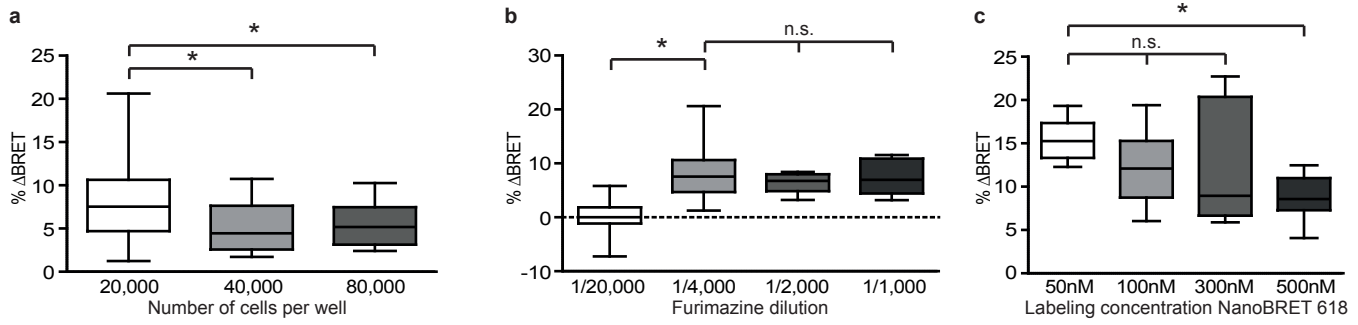

**Supplementary Figure 3.** Optimization of the BRET assay. **(a)** Increasing number of transiently transfected cells ( $\alpha_{2A}AR_{\text{Nluc/Halo}}$ ) were seeded in 96-well plates and the 100  $\mu\text{M}$  norepinephrine-induced BRET changes were evaluated for a given dilution of substrate (1/4,000) and concentration of HaloTag dye (100 nM). **(b)** 20,000 cells transiently expressing the  $\alpha_{2A}AR_{\text{Nluc/Halo}}$  biosensor were plated per well and after labelling with the HaloTag618 dye (100 nM) the 100  $\mu\text{M}$  norepinephrine-induced BRET changes as a function of the substrate dilution (furimazine) were evaluated. **(c)** Cells stably expressing the  $\alpha_{2A}AR_{\text{Nluc/Halo}}$  biosensor were plated in a 96-well plate (20,000 cells/well) and the effect of increasing concentrations of the fluorescent dye on the 100  $\mu\text{M}$  norepinephrine-induced BRET amplitude was estimated for a given substrate dilution (1/4,000). Data show box and whisker plots of 3 independent experiments. Difference was analyzed by two-way ANOVA followed by Bonferroni post hoc test. \* $p \leq 0,05$  versus 20,000 cells (a); 1/4,000 furimazine dilution (b); 50nM NanoBRET618 (c)

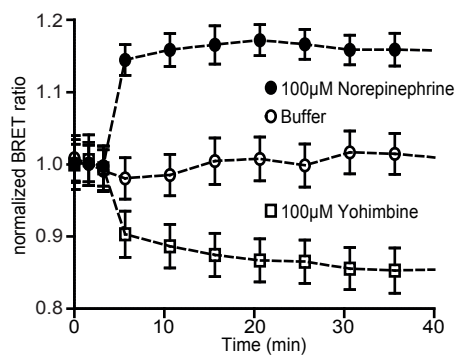

**Supplementary Figure 4.** Stability of the BRET change over time. Normalized BRET ratio of HEK293 cells stably expressing the  $\alpha_{2A}$ AR<sup>Nluc/Halo</sup> biosensor were treated with Norepinephrine (N=3), buffer (N=4) and Yohimbine (N=4). Data show mean $\pm$ s.e.m.

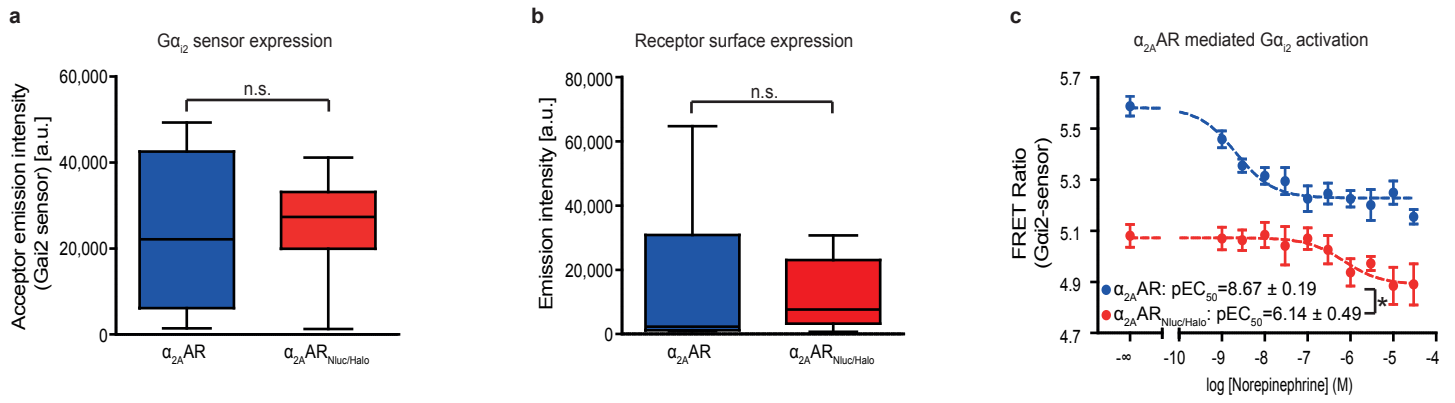

**Supplementary Figure 5.** Activation of downstream  $G\alpha_{12}$  is preserved for the  $\alpha_{2A}$  AR<sub>Nluc/Halo</sub> BRET-biosensor. G protein activation was evaluated in 96-well plates using the  $G\alpha_{12}$  FRET-sensor transiently co-transfected with  $\alpha_{2A}$  AR wild-type receptor (blue) or with the biosensor  $\alpha_{2A}$  AR<sub>Nluc/Halo</sub> (red) both possessing an HA-tag at the N-terminus. **(a)**  $G\alpha_{12}$  expression: emission of  $G\alpha_{12}$  FRET acceptor upon direct excitation. **(b)**  $\alpha_{2A}$  AR expression: emission of the fluorescent anti HA-tag antibody (Alexa-Fluor594-conjugated anti-HA). **(c)** FRET ratios upon stimulation with increasing concentrations of norepinephrine fitted to a single component concentration-response curve. Data show box and whisker plots (a,b) or mean  $\pm$  s.e.m. (c) of 3 independent experiments. In whisker plots, difference was analyzed by Student's t-test and Extra-sum-of-squares F-test was applied to test for statistical difference between the two  $EC_{50}$  values in (c). \* $p \leq 0,05$ .

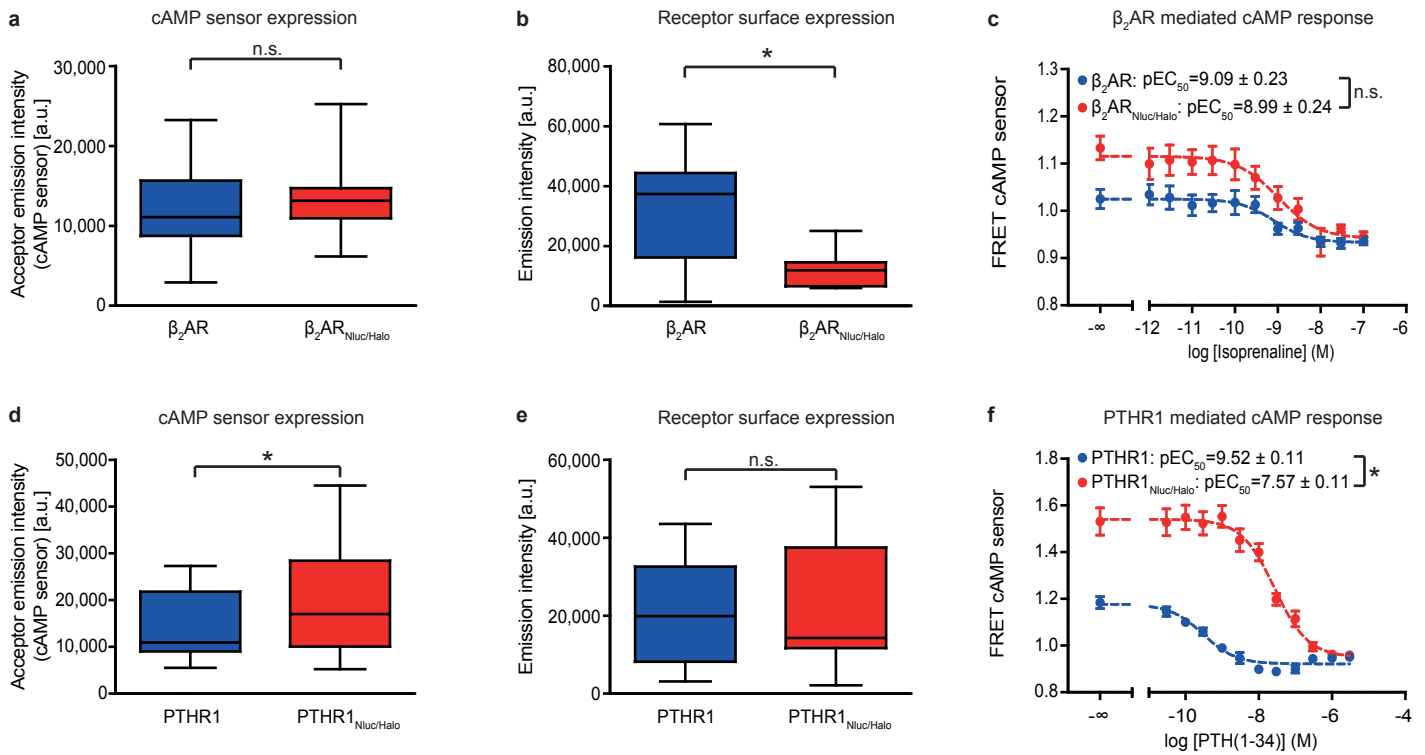

**Supplementary Figure 6.** cAMP signaling is preserved for the  $\beta_2$ AR<sub>Nluc/Halo</sub> and PTHR1<sub>Nluc/Halo</sub> BRET-biosensors. cAMP accumulation was evaluated in 96-well plates using the FRET-based H187-EPAC sensor transiently co-transfected with  $\beta_2$ AR and PTHR1 wild-type receptors (blue) or with the biosensors  $\beta_2$ AR<sub>Nluc/Halo</sub> or PTHR1<sub>Nluc/Halo</sub> (red). **(a, d)** H187-EPAC expression: emission of the cAMP FRET acceptor upon direct excitation. **(b, e)** Receptor expression: emission of the fluorescent Cy3-conjugated anti-FLAG antibody against the epitope on  $\beta_2$ AR **(b)** or anti-HA antibody against the epitope on PTHR1 **(e)**. **(c, f)** Concentration-response curves obtained upon stimulation with increasing concentration of isoprenaline **(c)** or PTH(1-34) **(f)**. FRET ratios are fitted to a mono-exponential concentration-response curve. Data show box and whisker plots (a,b,d,e) or mean $\pm$ s.e.m. (c,f) of 3 independent experiments. In whisker plots, difference was analyzed by Student's t-test and Extra-sum-of squares F-test was applied to test for statistical difference between the two  $EC_{50}$  values in (c) and (f). \* $p \leq 0,05$ .

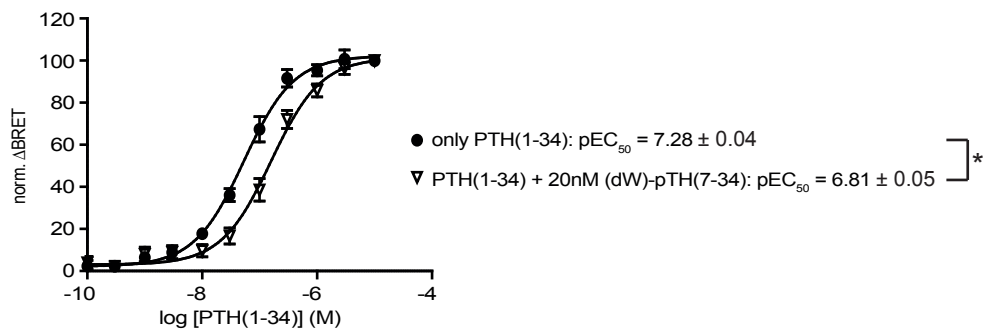

**Supplementary Figure 7.** Antagonistic effect of (dW)-PTH(7-34) on PTHR  $\Delta$ BRET signals. Cells transiently expressing the PTHR1<sub>Nluc/Halo</sub> BRET-sensor were labeled and plated as described earlier. BRET amplitudes in presence of the full agonist PTH(1-34) alone (N=3) or after 60 minutes pre-treatment with the antagonist (20 nM) (N=4) were measured and fitted to a sigmoidal concentration-response curve. Data show mean  $\pm$  s.e.m. Extra-sum-of-squares F-test was applied to test for statistical difference between the two  $EC_{50}$  values. \* $p \leq 0,05$ .

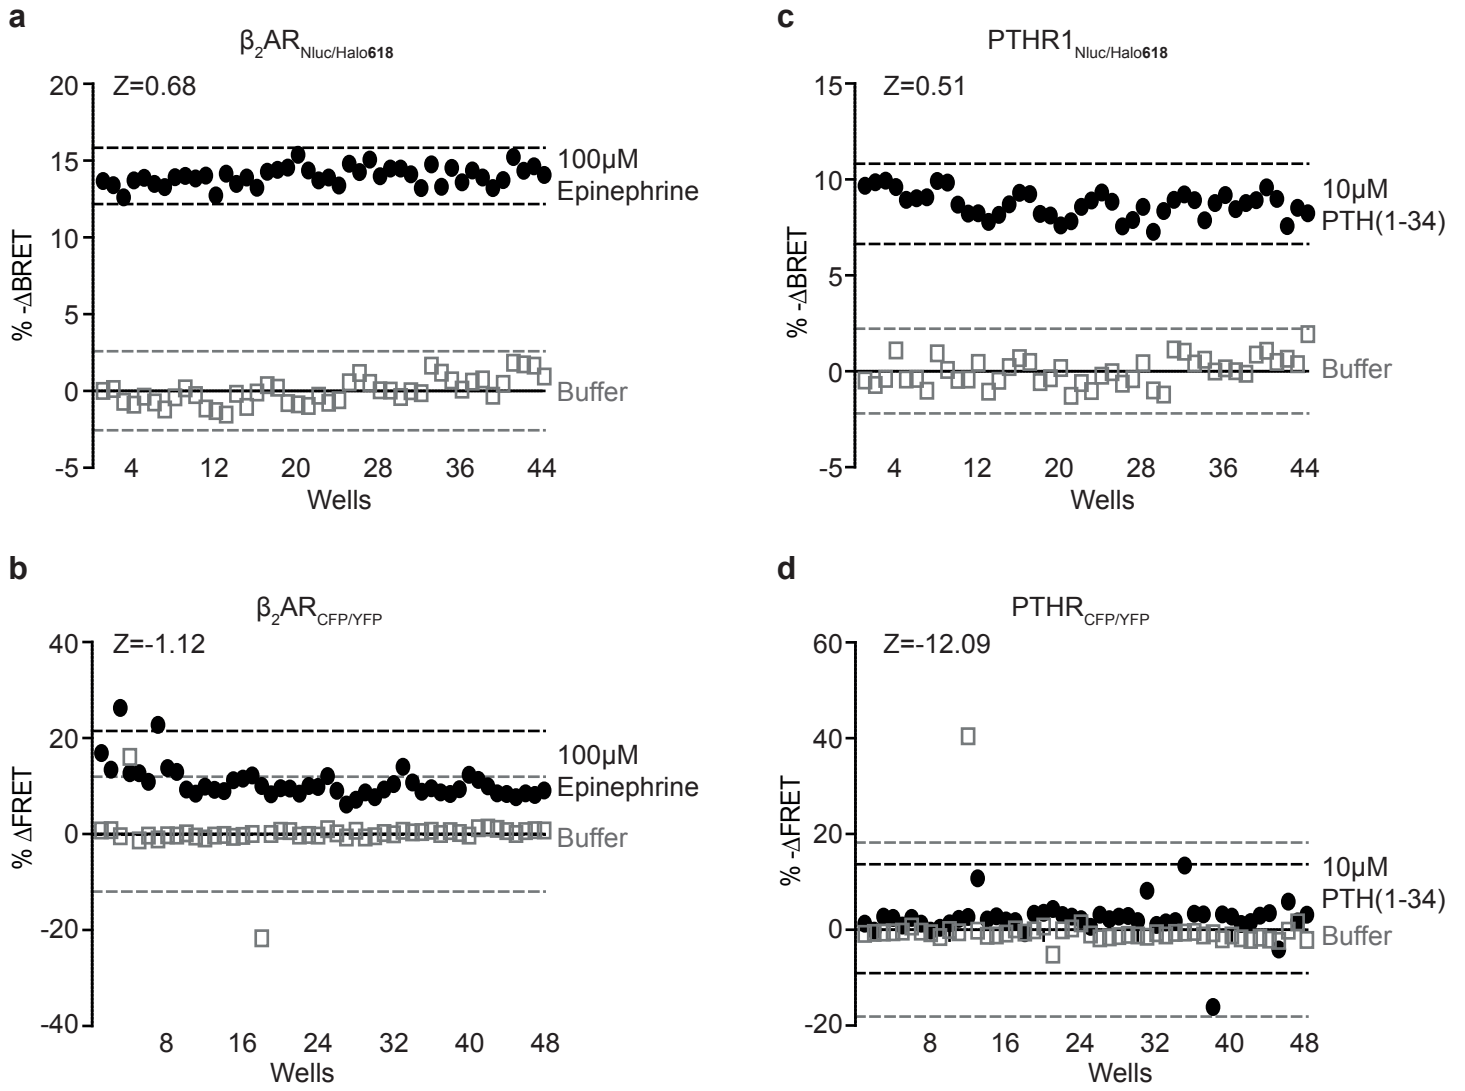

**Supplementary Figure 8.** Measurement of Z-factors for FRET and BRET based biosensors. Cells expressing the FRET<sub>CFP/YFP</sub> or BRET<sub>Nluc/Halo</sub> versions of the  $\beta_2AR$  and PTHR1 biosensors were transfected (for FRET biosensor), plated and labeled as described earlier in 96-well plates. Shown are representative experiments. Each data point expresses the  $\Delta$ FRET or  $\Delta$ BRET value of an individual well upon 100  $\mu$ M epinephrine or buffer (**a,b**) and PTH(1-34) (10  $\mu$ M PTH(1-34)) or buffer (**c,d**) stimulation.



| Target        | Ligand             | Activity*                                   |
|---------------|--------------------|---------------------------------------------|
| $\alpha_2$ AR | (-)-Epinephrine    | Full agonist                                |
|               | (-)-Norepinephrine | Full agonist                                |
|               | UK 14,304          | Full agonist / Partial agonist <sup>1</sup> |
|               | Dopamine           | Partial agonist <sup>2</sup>                |
|               | Oxymetazoline      | Partial agonist                             |
|               | Octopamine         | Partial agonist <sup>2</sup>                |
|               | Clonidine          | Partial agonist                             |
|               | Phentolamine       | Antagonist                                  |
|               | Tyramine           | Antagonist <sup>3</sup>                     |
|               | Yohimbine          | Antagonist / Inverse agonist <sup>4</sup>   |
| $\beta_2$ AR  | (-)-Epinephrine    | Full agonist                                |
|               | Isoprenaline       | Full agonist                                |
|               | Salmeterol         | Full Agonist                                |
|               | Formoterol         | Agonist                                     |
|               | (-)-Norepinephrine | Agonist                                     |
|               | Terbutaline        | Partial agonist                             |
|               | Salbutamol         | Partial agonist                             |
|               | Labetalol          | Antagonist                                  |
|               | Carvedilol         | Antagonist                                  |
|               | Metoprolol         | Antagonist                                  |
|               | Propranolol        | Antagonist                                  |
|               | ICI 118.551        | Inverse agonist                             |
| PTH1R         | PTH(1-34)          | Full agonist                                |
|               | PTHrP(1-34)        | Full agonist                                |
|               | PTH(1-31)          | Agonist <sup>5</sup>                        |
|               | (dW)-PTH(7-34)     | Antagonist                                  |
|               | PTH(7-34)          | Antagonist <sup>5</sup>                     |
|               | PTH(3-34)          | Antagonist <sup>5</sup>                     |

\*: If no publication is cited, ligand activity corresponds to the IUPHAR ligand classification database. (<http://www.guidetopharmacology.org/>). Only for compounds where no entry for the specific target could be found in the IUPHAR database, primary literature has been cited as a reference.

**Supplementary Table 1.** Expected activities of applied compounds

| <b>Ligand</b>             | <b><math>\alpha_{2A}AR</math> wild-type<br/><math>pK_i \pm s.e.m. (N)</math></b> | <b><math>\alpha_{2A}AR^{NIuc/Halo}</math><br/><math>pK_i \pm s.e.m. (N)</math></b> |
|---------------------------|----------------------------------------------------------------------------------|------------------------------------------------------------------------------------|
| Epinephrine               | 4.83 $\pm$ 0.05 (3)                                                              | 5.17 $\pm$ 0.16 (4)                                                                |
| Norepinephrine            | 4.57 $\pm$ 0.10 (3)                                                              | 4.55 $\pm$ 0.14 (6)                                                                |
| UK 14,304                 | 5.57 $\pm$ 0.25 (3)                                                              | 5.42 $\pm$ 0.02 (4)                                                                |
| Oxymetazoline             | 6.47 $\pm$ 0.07 (3)                                                              | 6.56 $\pm$ 0.08 (4)                                                                |
| Octopamine                | 3.66 $\pm$ 0.11 (4)                                                              | 3.99 $\pm$ 0.09 (4)                                                                |
| Clonidine                 | 5.81 $\pm$ 0.05 (3)                                                              | 5.88 $\pm$ 0.09 (4)                                                                |
| Phentolamine              | 6.31 $\pm$ 0.09 (3)                                                              | 6.87 $\pm$ 0.19 (4)                                                                |
| Tyramine                  | 3.09 $\pm$ 0.14 (3)                                                              | 3.87 $\pm$ 0.01 (3)                                                                |
| Yohimbine                 | 6.09 $\pm$ 0.42 (4)                                                              | 6.60 $\pm$ 0.10 (4)                                                                |
|                           | <b><math>pK_D \pm s.e.m. (N)</math></b>                                          | <b><math>pK_D \pm s.e.m. (N)</math></b>                                            |
| [ <sup>3</sup> H]RX821002 | 9.17 $\pm$ 0.05 (3)                                                              | 9.19 $\pm$ 0.05 (3)                                                                |

**Supplementary Table 2.** Comparison of ligand binding to the low affinity states of  $\alpha_{2A}AR$ -wild-type versus  $\alpha_{2A}AR^{NIuc/Halo}$  biosensor.

| Ligand         | $\alpha_2\text{AAR}_{\text{NIuc/Halo}}$<br>$\text{p}K_i \pm \text{s.e.m. (N)}$ |                     | BRET assay<br>$\alpha_2\text{AAR}_{\text{NIuc/Halo}}$<br>$\text{pEC}_{50} \pm \text{s.e.m. (N)}$ |
|----------------|--------------------------------------------------------------------------------|---------------------|--------------------------------------------------------------------------------------------------|
|                | High affinity state                                                            | Low affinity state  |                                                                                                  |
| Epinephrine    | $5.79 \pm 0.15$ (3)                                                            | $5.17 \pm 0.16$ (4) | $6.40 \pm 0.10$ (4)                                                                              |
| Norepinephrine | $5.26 \pm 0.08$ (3)                                                            | $4.55 \pm 0.14$ (6) | $5.70 \pm 0.09$ (6)                                                                              |
| UK 14,304      | $6.62 \pm 0.20$ (3)                                                            | $5.42 \pm 0.02$ (4) | $7.23 \pm 0.23$ (3)                                                                              |
| Oxymetazoline  | $6.82 \pm 0.21$ (3)                                                            | $6.56 \pm 0.08$ (4) | $6.24 \pm 0.15$ (4)                                                                              |
| Octopamine     | $4.25 \pm 0.02$ (3)                                                            | $3.99 \pm 0.09$ (4) | $4.38 \pm 0.14$ (4)                                                                              |
| Clonidine      | $6.77 \pm 0.03$ (3)                                                            | $5.88 \pm 0.09$ (4) | $6.81 \pm 0.13$ (4)                                                                              |
| Phentolamine   | n.d.                                                                           | $6.87 \pm 0.19$ (4) | $7.17 \pm 0.14$ (5)                                                                              |
| Tyramine       | n.d.                                                                           | $3.87 \pm 0.01$ (3) | $4.35 \pm 0.12$ (4)                                                                              |
| Yohimbine      | n.d.                                                                           | $6.60 \pm 0.10$ (4) | $6.61 \pm 0.13$ (7)                                                                              |

**Supplementary Table 3.**  $\text{pEC}_{50}$  of  $\alpha_2\text{AAR}$  ligands in the GPCR BRET sensor assay compared to ligand binding data of  $\alpha_2\text{AAR}_{\text{NIuc/Halo}}$ .

| <b>Ligand</b> | <b>pEC<sub>50</sub> ± s.e.m.<br/>BRET sensor</b> | <b>pK<sub>i</sub> (95% CI)<br/>radioligand binding</b> |
|---------------|--------------------------------------------------|--------------------------------------------------------|
| Epinephrine   | 6.45 ± 0.14                                      | 6.13 (5.98 – 6.29) <sup>6</sup>                        |
| Carvedilol    | n.a.                                             | 8.96 (8.80 – 9.10) <sup>6</sup>                        |
| ICI 118,551   | 9.57 ± 0.16                                      | 9.15 (8.96 – 9.40) <sup>6</sup>                        |

**Supplementary Table 4.** pEC<sub>50</sub> of β<sub>2</sub>AR ligands in the GPCR BRET sensor assay compared to literature data.

| Ligand       | pEC <sub>50</sub> ± s.e.m.<br>BRET sensor | pki ± s.e.m.<br>radioligand binding    |
|--------------|-------------------------------------------|----------------------------------------|
| PTH (1-34)   | 7.28 ± 0.04                               | 7.41 ± 0.04 <sup>7</sup>               |
| PTHrP (1-34) | 7.69 ± 0.08                               | 7.82 ± 0.15 / 8.13 ± 0.33 <sup>8</sup> |
| PTH (3-34)   | 6.63 ± 0.49                               | n.a.                                   |

**Supplementary Table 5.** pEC<sub>50</sub> of PTH1R ligands in the GPCR BRET sensor assay compared to radioligand binding.

#### Supplementary References:

1. Sungkaworn, T. et al. Single-molecule imaging reveals receptor-G protein interactions at cell surface hot spots. *Nature* **550**, 543-547 (2017).
2. Peltonen, J.M. et al. Molecular mechanisms of ligand-receptor interactions in transmembrane domain V of the alpha2A-adrenoceptor. *Br J Pharmacol* **140**, 347-358 (2003).
3. Nikolaev, V.O., Hoffmann, C., Bunemann, M., Lohse, M.J. & Vilardaga, J.P. Molecular basis of partial agonism at the neurotransmitter alpha2A-adrenergic receptor and Gi-protein heterotrimer. *The Journal of biological chemistry* **281**, 24506-24511 (2006).
4. Wade, S.M., Lan, K., Moore, D.J. & Neubig, R.R. Inverse agonist activity at the alpha(2A)-adrenergic receptor. *Molecular pharmacology* **59**, 532-542 (2001).
5. Appleton, K.M. et al. Biasing the parathyroid hormone receptor: relating in vitro ligand efficacy to in vivo biological activity. *Methods Enzymol* **522**, 229-262 (2013).
6. Hoffmann, C., Leitz, M.R., Oberdorf-Maass, S., Lohse, M.J. & Klotz, K.N. Comparative pharmacology of human beta-adrenergic receptor subtypes--characterization of stably transfected receptors in CHO cells. *Naunyn Schmiedebergs Arch Pharmacol* **369**, 151-159 (2004).
7. Gardella, T.J., Luck, M.D., Jensen, G.S., Usdin, T.B. & Juppner, H. Converting parathyroid hormone-related peptide (PTHrP) into a potent PTH-2 receptor agonist. *The Journal of biological chemistry* **271**, 19888-19893 (1996).
8. Gardella, T.J. et al. Parathyroid hormone (PTH)-PTH-related peptide hybrid peptides reveal functional interactions between the 1-14 and 15-34 domains of the ligand. *The Journal of biological chemistry* **270**, 6584-6588 (1995).
